# Supplementary material
Source: PubMed Central journal article supplement (PMC3757932)
Supplement: NIHMS455421-supplement-2.pdf [file NIHMS455421-supplement-2.pdf]

**Supplementary Table 1. Candidate HLA-A\*0201-binding epitopes indentified from 2098 mel.**

| No. | Mutated peptide               | WT Peptide              | Protein change       | cDNA change           | Predicted HLA-A*0201 binding affinity (nM) |       | Gene      | Gene ID    | Expressed gene  | IFN- $\gamma$ (pg/ml) |
|-----|-------------------------------|-------------------------|----------------------|-----------------------|--------------------------------------------|-------|-----------|------------|-----------------|-----------------------|
|     |                               |                         |                      |                       | Mutated                                    | WT    |           |            |                 |                       |
| 1   | <u>FLLGKTSSV</u> <sup>a</sup> | FLQGKTSSV               | p.Q136L <sup>b</sup> | c.299A>T <sup>c</sup> | 4                                          | 9     | ZNF559    | uc002mle.2 | WT <sup>d</sup> | 130                   |
| 2   | YMFSDC <u>STSL</u>            | YMFSDRSTSL              | p.R91C               | c.271G>A              | 4                                          | 8     | TRPC6     | uc001pgk.2 | NA              | <30                   |
| 3   | SLLSLLYAL                     | SSL <del>S</del> LLYAL  | p.S32L               | c.95C>T               | 4                                          | 374   | SERPINB11 | uc002ljk.2 | NA              | 172                   |
| 4   | LMMPFSIVYI                    | LYMPFSIVYI              | p.V76M               | c.226G>A              | 4                                          | 20    | HTR1F     | uc003dqr.2 | NA              | 75                    |
| 5   | <b>GLFGDIYLA</b>              | G <del>S</del> FGDIYLA  | p.S27L               | c.80_81CC>TA          | 6                                          | 1312  | CSNK1A1   | uc003lqw.1 | Mut/WT          | 41,925                |
| 6   | <u>FQLNQSF</u> EI             | SQLNQSFEI               | p.S1281F             | c.3842G>A             | 6                                          | 53    | UNC13A    | uc002nhd.1 | Mut/WT          | 117                   |
| 7   | FILDAVQRV                     | SILDAVQRV               | p.S613F              | c.1838G>A             | 6                                          | 44    | PXDNL     | uc003xqu.2 | NA              | <30                   |
| 8   | <u>HLFCV</u> FYGL             | RLFCVFYGL               | p.R112H              | c.335C>T              | 6                                          | 5     | KCNK5     | uc003oon.1 | WT              | 67                    |
| 9   | FLLGKTSSV                     | FLQGKTSSV               | p.Q136L              | c.299A>T              | 7                                          | 9     | ZNF559    | uc002mlh.1 | WT              | NT <sup>d</sup>       |
| 10  | MMPF <del>S</del> IVYIV       | VMPF <del>S</del> IVYIV | p.V76M               | c.226G>A              | 7                                          | 17    | HTR1F     | uc003dqr.2 | NA              | NT                    |
| 11  | SLAPLSPRV                     | SLAPLSPRA               | p.A310V              | c.929C>T              | 7                                          | 79    | CNKSR1    | uc001blm.2 | NA              | 39                    |
| 12  | LLIASVTWLL                    | FLIASVTWLL              | p.F254L              | c.762G>A              | 7                                          | 3     | MAR11     | uc003jfo.2 | NA              | <30                   |
| 13  | RMLDKNPEV                     | RMLDKNPES               | p.S433V              | c.1297-1298TC>GT      | 7                                          | 1722  | CAMKK2    | uc001txt.1 | Mut/WT          | <30                   |
| 14  | MMPF <del>S</del> IVYI        | VMPF <del>S</del> IVYI  | p.V76M               | c.226G>A              | 8                                          | 29    | HTR1F     | uc003dqr.2 | NA              | NT                    |
| 15  | HLMDGDLGL                     | NLMDGDLGL               | p.N558H              | c.1672C>A             | 10                                         | 11    | C1S       | uc001qsj.1 | Mut/WT          | 222                   |
| 16  | LLGDPGWRV                     | LLGDPGRRV               | p.R72W               | c.214T>C              | 11                                         | 1081  | KCNA6     | uc001qnf.1 | NA              | <30                   |
| 17  | FSFSLDFLV                     | FSFPLDFLV               | p.P251S              | c.751T>C              | 11                                         | 17    | GPR174    | uc004edg.1 | NA              | <30                   |
| 18  | <b>GLFGDIYLAI</b>             | G <del>S</del> FGDIYLAI | p.S27L               | c.80_81CC>TA          | 12                                         | 2394  | CSNK1A1   | uc003lqw.1 | Mut/WT          | 31,538                |
| 19  | <b>SLADEAEVYL</b>             | SLADEAEVHL              | p.H225Y              | c.673C>T              | 12                                         | 39    | GAS7      | uc002gmi.1 | Mut/WT          | 57,938                |
| 20  | MLFLRFCYI                     | MLFLRFRI                | p.R55C               | c.247G>A              | 12                                         | 116   | WDR47     | uc001dww.1 | Mut/WT          | <30                   |
| 21  | FLQKYTVKL                     | FLQEYTVKL               | p.E183 K             | c.547C>T              | 13                                         | 3     | GSTA4     | uc003pbc.1 | NA              | 32                    |
| 22  | CLFLEIYTV                     | CLFLGIYTV               | p.G33E               | c.98G>A               | 13                                         | 10    | OR8D4     | uc001pzj.1 | NA              | 185                   |
| 23  | MSFSLFYFL                     | MSSSHLFYFL              | p.S13F               | c.86G>A               | 14                                         | 151   | IGF1      | uc001tjn.2 | NA              | NT                    |
| 24  | LLIASVTWL                     | FLIASVTWL               | p.F254L              | c.762C>C              | 15                                         | 4     | MAR11     | uc003jfo.2 | NA              | NT                    |
| 25  | TMSFSLFYFL                    | TMSSSHLFYFL             | p.S13F               | c.86G>A               | 16                                         | 14    | IGF1      | uc001tjm.2 | NA              | <30                   |
| 26  | FLEIYTVTV                     | FLGIYTVTV               | p.G33E               | c.98G>A               | 17                                         | 6     | OR8D4     | uc001pzj.1 | NA              | <30                   |
| 27  | YLTSLACVEI                    | YPTSLACVEI              | p.P1039L             | c.3116C>T             | 17                                         | 21684 | BRCA2     | uc001uub.1 | Mut/WT          | <30                   |
| 28  | LLADQNFKFI                    | LLADQNLKFI              | p.L190F              | c.568C>T              | 20                                         | 30    | RRP1B     | uc002zdk.1 | Mut/WT          | <30                   |
| 29  | SLSTSLSSV                     | SLSTSSSV                | p.S1084L             | c.3251G>A             | 21                                         | 189   | CNTN5     | uc001pga.1 | NA              | 72                    |
| 30  | AMIAKISNEL                    | AMITKISNEL              | p.T160A              | c.478T>C              | 22                                         | 33    | HAUS3     | uc003ges.1 | Mut/WT          | <30                   |
| 31  | HLMDGDLGLI                    | NLMDGDLGLI              | p.N558H              | c.1672A>C             | 22                                         | 20    | C1S       | uc001qsj.1 | Mut/WT          | NT                    |
| 32  | ALGTLHTNV                     | ALGTLHTNL               | p.L1577V             | c.4729C>G             | 23                                         | 143   | NOTCH2    | uc001eik.1 | Mut/WT          | <30                   |
| 33  | TLLGDPGWRV                    | TLLGDPGRRV              | p.R to W             | c.214C>T              | 23                                         | 835   | KCNA6     | uc001qnf.1 | NA              | NT                    |
| 34  | SVVDVFEQL                     | SVVDVFSQL               | p.S1281F             | c.3842G>A             | 28                                         | 323   | UNC13A    | uc002nhd.1 | Mut/WT          | <30                   |
| 35  | LLQAYRLISV                    | PLQAYRLISV              | p.P819L              | c.2456_2457CT>TG      | 28                                         | 1091  | USP29     | uc002qny.1 | NA              | <30                   |
| 36  | MLSILALVRV                    | MLSILALVGV              | p.G65R               | c.193G>A              | 31                                         | 19    | C15orf32  | uc002brc.1 | NA              | <30                   |
| 37  | VLMMPFSIV                     | VLYMPFSIV               | p.V76M               | c.226G>A              | 33                                         | 189   | HTR1F     | uc003dqr.2 | NA              | NT                    |
| 38  | <b>ILNAMI</b> AKI             | ILNAMITKI               | p.T160A              | c.478T>C              | 34                                         | 36    | HAUS3     | uc003ges.1 | Mut/WT          | 4,180                 |
| 39  | GLNETIAKL                     | GLDETIAKL               | p.D990N              | c.2968C>T             | 35                                         | 34    | MYH4      | uc002gmn.1 | NA              | 44                    |
| 40  | YTAPYPHPA                     | YTAPHPHPA               | p.H45Y               | c.133C>T              | 36                                         | 182   | A2BP1     | uc002cyr.1 | NA              | <30                   |
| 41  | ALVGAISSI                     | ALVGAIPSI               | p.P1333S             | c.3997G>A             | 39                                         | 12    | SCN3A     | uc002ucx.1 | NA              | 36                    |
| 42  | FLEIYTVTV                     | FLGIYTVTV               | p.G33E               | c.98G>A               | 39                                         | 6     | OR8D4     | uc001pzj.1 | NA              | 56                    |
| 43  | RLAVCHFPCL                    | HLAVCHFPCL              | p.H79R               | c.236T>C              | 42                                         | 84    | GALNT14   | uc002rms.1 | NA              | 98                    |
| 44  | SLSSVTLLL                     | SSSVTLLL                | p.S1084L             | c.3251C>T             | 48                                         | 7240  | CNTN5     | uc001pga.1 | NA              | <30                   |
| 45  | SLFKGLHHKA                    | SLSKGLHHKA              | p.S17F               | c.50G>A               | 48                                         | 488   | AASS      | uc003vka.1 | NA              | <30                   |
| 46  | YTSEHAASV                     | YTPEHAASV               | p.P16S               | c.46C>T               | 50                                         | 95    | AK310432  | uc009vll.1 | NA              | <30                   |
| 47  | AICKPLHYV                     | AICKPLHYM               | p.M131V              | c.406C>G              | 50                                         | 2504  | OR6C68    | uc001shb.1 | NA              | <30                   |
| 48  | ALLMCLLPL                     | ALLMCPLPL               | p.P789L              | c.2366C>T             | 52                                         | 75    | C1orf175  | uc001cxp.1 | NA              | <30                   |
| 49  | VIIGITIDSV                    | VIIGITIASV              | p.A1107D             | c.3320G>T             | 52                                         | 24    | IMPG2     | uc003duq.1 | NA              | <30                   |
| 50  | AIPAMVVPNV                    | AIPAMVVPNA              | p.A29V               | c.86C>T               | 52                                         | 894   | CRISPLD1  | uc003yan.1 | Mut/WT          | <30                   |
| 51  | MQANS <del>S</del> HYARV      | MQANPHYARV              | p.P427S              | c.1279C>T             | 55                                         | 70    | CRISPLD1  | uc003yan.1 | Mut/WT          | <30                   |
| 52  | GLPFMCHAEV                    | GLPFMCHAGV              | p.G319E              | c.956G>A              | 58                                         | 101   | IL1RL2    | uc002tbs.1 | NA              | <30                   |
| 53  | YLDELIRNT                     | YLDELIKNT               | p.K1410R             | c.4229A>G             | 58                                         | 78    | A2ML1     | uc001quz.2 | NA              | <30                   |
| 54  | WMSDSGTRL                     | WMSDSGTGL               | p.G211R              | c.631C>T              | 60                                         | 29    | MPHOSPH9  | uc001uel.1 | NA              | <30                   |
| 55  | LLIASVTWL                     | LFLIASVTWL              | p.F254L              | c.762G>C              | 63                                         | 7369  | MAR11     | uc003jfo.2 | NA              | <30                   |
| 56  | <u>KLYFDEK</u> YSI            | <u>ELYFDEK</u> YSI      | p.E81K               | c.241C>T              | 64                                         | 3189  | NETO1     | uc002lkw.2 | NA              | <30                   |
| 57  | KLLPTNTNI                     | KLLPTNTDI               | p.D98N               | c.292G>A              | 64                                         | 210   | C20orf70  | uc002wyo.1 | NA              | <30                   |
| 58  | SLDLPLNPL                     | SLDLPLDPL               | p.D457N              | c.1369G>A             | 66                                         | 101   | FGFR4     | uc003mfl.1 | NA              | 100                   |
| 59  | CMQANSHYA                     | CMQANPHYA               | p.P427S              | c.1279C>T             | 68                                         | 77    | CRISPLD1  | uc003yan.1 | Mut/WT          | 15                    |
| 60  | GLDGYREYSL                    | GLDGYRGYSL              | p.G 109E             | c.326G>A              | 71                                         | 136   | SPACA3    | uc002hhs.1 | NA              | <30                   |
| 61  | SLQDHCCRAV                    | SLQDLCCRAV              | p.L195H              | c.584A>T              | 71                                         | 66    | RAB40B    | uc002kft.1 | Mut/WT          | 30                    |
| 62  | MLAVFKLYPT                    | MLAVSKLYPT              | p.S226F              | c.677G>A              | 74                                         | 148   | GPLD1     | uc003ned.1 | WT              | <30                   |

a. Mutated residues are underlined, and peptides recognized by TIL 2098 are bolded.

b. The wild type amino acid is followed by the mutated residue along with its position.

c. The wild type base is followed by the mutated base along with its position in the coding sequence.

d. Oligonucleotide primers flanking the regions that encode the candidate epitopes detailed in Supplementary Methods Primer list were used to amplify the indicated transcripts as described in the Online Methods. Mut - mutated WT-wild type NA- A product corresponding to the appropriate gene product was not amplified from tumor cell RNA.

e. NT - The indicated peptides were not tested, as they overlapped extensively with additional peptides that were evaluated in this assay for T cell recognition.

**Supplementary Table 2. Candidate HLA-A\*0101-binding epitopes identified from 2369 mel.**

| No. | <u>Mutated Peptide</u>                    | <u>WT Peptide</u>                                    | <u>Protein change</u> | <u>cDNA change</u>    | Predicted HLA-A*0101 binding affinity (nM) |           | <u>Gene</u> | <u>Gene ID</u> | <u>Expressed gene</u> | <u>IFN-γ (pg/ml)</u> |
|-----|-------------------------------------------|------------------------------------------------------|-----------------------|-----------------------|--------------------------------------------|-----------|-------------|----------------|-----------------------|----------------------|
|     |                                           |                                                      |                       |                       | <u>Mutated</u>                             | <u>WT</u> |             |                |                       |                      |
| 1   | FSDYYDLSY <sup>a</sup>                    | FSDYYDLGY                                            | p.G117S <sup>b</sup>  | c.349C>T <sup>c</sup> | 2                                          | 2         | C22orf33    | uc003aqe.1     | NA <sup>d</sup>       | <30                  |
| 2   | <b>LTDDR<sup>u</sup>LF<sup>u</sup>TCY</b> | LTDDR <sup>u</sup> LF <sup>u</sup> TC <sup>u</sup> H | p.H1005Y              | c.3013C>T             | 3                                          | 97        | PLEKHM2     | uc001axa.2     | Mut                   | 8,655                |
| 3   | YSSALDLCY                                 | YSSALNLCY                                            | p.N621D               | c.861A>G              | 5                                          | 4         | GRIN3B      | uc002lqo.1     | NA                    | <30                  |
| 4   | <b>FSDK<sup>u</sup>KVGT<sup>u</sup>Y</b>  | <b>LSDK<sup>u</sup>KVGT<sup>u</sup>Y</b>             | p.L688F               | c.2062C>T             | 5                                          | 8         | PLCB1       | uc002wna.1     | Mut/WT                | <30                  |
| 5   | HSEYSSFF <sup>u</sup> Y                   | HSEYSSFF <sup>u</sup> H                              | p.H603Y               | c.1807G>A             | 6                                          | 867       | HEG1        | uc003ehs.2     | Mut/WT                | <30                  |
| 6   | CSNFLLLAY                                 | CSNF <sup>u</sup> SLLAY                              | p.S84L                | c.251C>T              | 7                                          | 7         | BAI3        | uc003pev.2     | Mut/WT                | <30                  |
| 7   | ESDK <sup>u</sup> EELVGY                  | ESDK <sup>u</sup> EELVGY                             | p.F332L               | c.994A>G              | 7                                          | 8         | MPP4        | uc002uyj.2     | NA                    | <30                  |
| 8   | CTDTY <sup>u</sup> MLELF                  | CTDT <sup>u</sup> HMLELF                             | p.H191Y               | c.571C>T              | 8                                          | 9         | OR4C46      | uc001nhj.1     | NA                    | <30                  |
| 9   | FTGTIS <sup>u</sup> VMY                   | FTGTIP <sup>u</sup> VMY                              | p.P60S                | c.178G>A              | 12                                         | 11        | UEVLD       | uc001mot.1     | Mut/WT                | <30                  |
| 10  | QTQSVVFLY                                 | QTQSVVFS <sup>u</sup> Y                              | p.S156L               | c.467G>A              | 13                                         | 62        | COL9A1      | uc003pfg.2     | NA                    | <30                  |
| 11  | MSSYIASFTY                                | MSSYIASLTY                                           | p.L356F               | c.1066C>T             | 14                                         | 9         | LST-3TM12   | uc001ren.1     | NA                    | <30                  |
| 12  | ATALLEYLEY                                | ATALLEYPEY                                           | p.P466L               | c.1397_1398CC>TT      | 20                                         | 81        | TBRG4       | uc003tmv.1     | Mut/WT                | <30                  |
| 13  | CTDTY <sup>u</sup> MLEL                   | CTDT <sup>u</sup> HMLEL                              | p.H191Y               | c.571C>T              | 22                                         | 30        | OR4C46      | uc001nhj.1     | NA                    | <30                  |
| 14  | LLDLMAYDRY                                | LLGLMAYDRY                                           | p.G117D               | c.350G>A              | 22                                         | 1558      | OR2T2       | uc001iek.1     | NA                    | <30                  |
| 15  | SSDSQEENY                                 | SSDSQEGNY                                            | p.G117E               | c.530C>T              | 23                                         | 16        | MEOX2       | uc003stc.1     | NA                    | <30                  |
| 16  | LTSMA <sup>u</sup> YDCY                   | LTSMA <sup>u</sup> YDRY                              | p.R122C               | c.364G>A              | 31                                         | 25        | OR8B3       | uc001qac.1     | NA                    | <30                  |
| 17  | <b>YTDF<sup>u</sup>HCQYV</b>              | YTDF <sup>u</sup> PCQYV                              | p.P176H               | c.527G>T              | 49                                         | 72        | PPP1R3B     | uc003wsn.2     | Mut/WT                | 14,678               |
| 18  | WADWGHRTY                                 | WADWGHRA <sup>u</sup> Y                              | p.A3344T              | c.10030C>T            | 51                                         | 47        | LRP2        | uc002ues.1     | Mut/WT                | <30                  |
| 19  | FTMVILYVVY                                | FTMVISYVVY                                           | p.S219L               | c.656C>T              | 54                                         | 44        | LRR3B       | uc003cdp.1     | NA                    | <30                  |
| 20  | CVDSPPPLFF                                | CVDSPPPLS <sup>u</sup> F                             | p.S528F               | c.1583C>T             | 71                                         | 210       | C15orf2     | uc001ywo.1     | NA                    | <30                  |
| 21  | VSDGFTAVM                                 | VPDGFTAVM                                            | p.P198S               | c.592C>T              | 85                                         | 5735      | RNPEP       | uc001gxd.1     | Mut/WT                | <30                  |
| 22  | WSCLGHLGY                                 | RSCLGHLGY                                            | p.R267W               | c.799C>T              | 86                                         | 699       | MIRO-2      | uc002ciq.1     | NA                    | <30                  |
| 23  | <b>YTDF<sup>u</sup>HCQYVK</b>             | YTDF <sup>u</sup> PCQYVK                             | p.P176H               | c.527G>T              | 100                                        | 136       | PPP1R3B     | uc003wsn.2     | Mut/WT                | 8,835                |
| 24  | YTFLIESDY                                 | YTFLISSDY                                            | p.S849F               | c.2546C>T             | 104                                        | 72        | BCR         | uc002zww.1     | Mut/WT                | <30                  |
| 25  | ISANSPYISY                                | ISANSPYIPY                                           | p.P86 S               | c.257C>T              | 124                                        | 84        | ABCA12      | uc002vev.1     | NA                    | <30                  |
| 26  | SSFLVPSLPY                                | PSFLVPSLPY                                           | p.P796S               | c.2386C>T             | 125                                        | 479       | KIAA1211    | uc003hbk.2     | Mut/WT                | <30                  |
| 27  | VTLGIFFFFY                                | VTLGIF <sup>u</sup> SFFY                             | p.S125F               | c.374C>T              | 127                                        | 103       | SYPL2       | uc001dxo.2     | Mut                   | <30                  |
| 28  | <b>FSDK<sup>u</sup>KVGT<sup>u</sup>YV</b> | <b>LSDK<sup>u</sup>KVGT<sup>u</sup>YV</b>            | p.L688F               | c.2062C>T             | 134                                        | 262       | PLCB1       | uc002wna.1     | Mut/WT                | <30                  |
| 29  | HLEK <sup>u</sup> LCHGLY                  | HLG <sup>u</sup> LCHGLY                              | p.G318E               | c.953G>A              | 165                                        | 884       | PPP4R4      | uc001yca.1     | Mut/WT                | <30                  |
| 30  | LSEFTVMAY                                 | LSLFTVMAY                                            | p.L444F               | c.1330C>T             | 168                                        | 229       | FLRT2       | uc001xvr.1     | Mut/WT                | <30                  |
| 31  | KSGTFFVLAY                                | KSGTFSVLAY                                           | p.S269F               | c.806C>T              | 172                                        | 209       | HHLA2       | uc003dwy.2     | NA                    | <30                  |
| 32  | GTFFVLAYY                                 | GTF <sup>u</sup> SVLAYY                              | p.S269F               | c.806C>T              | 173                                        | 126       | HHLA2       | uc003dwy.2     | NA                    | <30                  |
| 33  | ITDVDELPIF                                | ITDVDEPIF                                            | p.P369L               | c.1106C>T             | 180                                        | 377       | CDH5        | uc002eom.2     | NA                    | <30                  |
| 34  | ISISSEQTFY                                | IPISSEQTFY                                           | p.P2632S              | c.5806C>T             | 191                                        | 8595      | PCLO        | uc003uhv.2     | Mut/WT                | <30                  |
| 35  | CVDSPPPLF                                 | CVDSPPPLS <sup>u</sup>                               | p.S528F               | c.1583C>T             | 193                                        | 3644      | C15orf2     | uc001ywo.1     | NA                    | NT <sup>e</sup>      |
| 36  | CTAGASSLLV                                | CTAGAGSLLV                                           | p.G307S               | c.919G>A              | 196                                        | 227       | EDEM1       | uc003bqh.1     | Mut/WT                | <30                  |
| 37  | NSDLSPYLCH                                | NSDLSPY <sup>u</sup> PCH                             | p.P592L               | c.1775C>T             | 224                                        | 1041      | NCAPH       | uc002svz.1     | WT                    | <30                  |
| 38  | L <sup>u</sup> VVLAPLLY                   | PVVLAPLLY                                            | p.P220L               | c.659G>A              | 253                                        | 942       | CNOT1       | uc002enu.2     | Mut/WT                | <30                  |
| 39  | ITDVDELPI                                 | ITDVDEPI                                             | p.P369L               | c.1106C>T             | 233                                        | 1833      | CDH5        | uc002eom.2     | NA                    | NT                   |
| 40  | YSSEENLIF                                 | YSSEG <sup>u</sup> NLIF                              | p.G1158E              | c.3473G>A             | 272                                        | 233       | RIMS2       | uc003yjp.2     | NA                    | <30                  |
| 41  | SSYIASFTY                                 | SSYIASLTY                                            | p.L356F               | c.1066C>T             | 273                                        | 104       | LST-3TM12   | uc001ren.1     | NA                    | <30                  |
| 42  | SISSEQTFY                                 | PISSEQTFY                                            | p.P2632S              | c.5806C>T             | 278                                        | 886       | PCLO        | uc003uhv.2     | Mut/WT                | <30                  |
| 43  | LTDTSLTAL                                 | PTDTSLTAL                                            | p.P199L               | c.596G>A              | 287                                        | 1447      | OC90        | uc003ytg.1     | NA                    | <30                  |
| 44  | LTDTSLTALS                                | PTDTSLTALS                                           | p.P199L               | c.596G>A              | 304                                        | 2147      | OC90        | uc003ytg.1     | NA                    | NT                   |
| 45  | SCSNFLLLAY                                | SCSNF <sup>u</sup> SLLAY                             | p.S84L                | c.251C>T              | 305                                        | 309       | BAI3        | uc003pev.2     | Mut/WT                | <30                  |
| 46  | ELDEETNLKF                                | ELDGETNLKF                                           | p.G233E               | c.698C>T              | 312                                        | 457       | ATP8B1      | uc002lgw.1     | Mut/WT                | <30                  |
| 47  | WLSFTVMAY                                 | WLSLFTVMAY                                           | p.L444F               | c.1330C>T             | 328                                        | 520       | FLRT2       | uc001xvr.1     | Mut/WT                | <30                  |
| 48  | SSDFTYLQEI                                | SSDFTILQEI                                           | p.I201V               | c.601A>G              | 398                                        | 359       | SAFB        | uc002mce.2     | Mut                   | <30                  |
| 49  | KAERSY <sup>u</sup> IFY                   | KAERSY <sup>u</sup> HIFY                             | p.H287Y               | c.859G>A              | 410                                        | 360       | MYH2        | uc002gmp.2     | NA                    | <30                  |
| 50  | YVDVTY <sup>u</sup> NFI                   | YVDVTY <sup>u</sup> DFI                              | p.D225N               | c.673C>T              | 411                                        | 539       | CHRN4       | uc002bed.1     | NA                    | <30                  |
| 51  | HLSHQAHRY                                 | HPSHQAHRY                                            | p.P495L               | c.1484G>A             | 413                                        | 6199      | CDC2L6      | uc003puh.1     | NA                    | <30                  |
| 52  | <b>FSDYERA<sup>u</sup>EW</b>              | <b>SSDYERA<sup>u</sup>EW</b>                         | p.S849F               | c.2546C>T             | 414                                        | 1751      | BCR         | uc002zww.1     | Mut/WT                | <30                  |
| 53  | VVNPII <sup>u</sup> FY                    | VVNPII <sup>u</sup> SY                               | p.S294F               | c.881G>A              | 431                                        | 1382      | LPAR3       | uc001dkl.2     | Mut                   | <30                  |
| 54  | FGYEHWALY                                 | LGYEHWALY                                            | p.L19F                | c.55C>T               | 439                                        | 944       | RARRES3     | uc001nxf.2     | Mut/WT                | <30                  |
| 55  | ISV <sup>u</sup> MYQGNTY                  | IPV <sup>u</sup> MYQGNTY                             | p.P60S                | c.178G>A              | 475                                        | 14715     | UEVLD       | uc001mot.1     | Mut/WT                | <30                  |
| 56  | YVDVTY <sup>u</sup> NFII                  | YVDVTY <sup>u</sup> DFII                             | p.D225N               | c.673C>T              | 476                                        | 545       | CHRN4       | uc002bed.1     | NA                    | <30                  |

a. Mutated residues are underlined, and peptides recognized by TIL 2369 are bolded.

b. The wild type amino acid is followed by the mutated residue along with its position.

c. The wild type base is followed by the mutated base along with its position in the coding sequence.

d. Oligonucleotide primers flanking the regions that encode the candidate epitopes detailed in Supplementary Table 7 were used to amplify the indicated transcripts as described in the Online Methods. Mut - mutated WT-wild type NA- A product corresponding to the appropriate gene product was not amplified from tumor cell RNA.

e. NT - The indicated peptides were not tested, as they overlapped extensively with additional peptides that were evaluated in this assay for T cell recognition.

**Supplementary Table 3. Candidate HLA-A\*2601-binding epitopes identified from 2369 mel.**

|     |                         |                   |                       | Predicted             |                | HLA-A*2601 binding |             |                |                                        |
|-----|-------------------------|-------------------|-----------------------|-----------------------|----------------|--------------------|-------------|----------------|----------------------------------------|
|     |                         |                   |                       | affinity (nM)         |                |                    |             |                |                                        |
| No. | <u>Mutated Peptide</u>  | <u>WT Peptide</u> | <u>Protein change</u> | <u>cDNA change</u>    | <u>Mutated</u> | <u>WT</u>          | <u>Gene</u> | <u>Gene ID</u> | <u>IFN-<math>\gamma</math> (pg/ml)</u> |
| 1   | EVSDGFTAVM <sup>a</sup> | EVPDGFTAVM        | p.P198S <sup>b</sup>  | c.592C>T <sup>c</sup> | 4              | 4                  | RNPEP       | uc001gxd.1     | <30                                    |
| 2   | EVYFGPCSLY              | EVYFGPCSPY        | p.P468L               | c.1403C>T             | 7              | 7                  | FMO3        | uc001ghh.1     | <30                                    |
| 3   | EVMKKLPLF               | EVMKKLPLS         | p.S488F               | c.1463C>T             | 10             | 2300               | KIF6        | uc010jxb.1     | <30                                    |
| 4   | SIPGIMGALY              | SIPGIMGALY        | p.T162I               | c.485C>T              | 19             | 19                 | CLP1        | uc001nkw.1     | <30                                    |
| 5   | ETADTKVHF               | GTADTKVHF         | p.G724E               | c.2171G>A             | 21             | 7247               | DPP10       | uc002tla.1     | <30                                    |
| 6   | FSKEDLAAM               | SSKEDLAAM         | p.S297F               | c.890C>T              | 25             | 82                 | RALGPS1     | uc004bqp.2     | <30                                    |
| 7   | YTIEEFMEL               | YTMEEFMEL         | p.M249I               | c.747G>A              | 25             | 80                 | ACSBG1      | uc002bdh.1     | <30                                    |
| 8   | DLIEIFRFGY              | DLIEIFRLGY        | p.L19F                | c.55C>T               | 26             | 26                 | RARRES3     | uc001nxf.2     | <30                                    |
| 9   | EINPSLHTPM              | GINPSLHTPM        | p.G50E                | c.149G>A              | 27             | 27                 | OR8B4       | uc001qad.1     | <30                                    |
| 10  | ETLSPTPSY               | ETPSPTPSY         | p.P1142L              | c.3425C>T             | 27             | 12                 | ROBO3       | uc001qbc.1     | <30                                    |
| 11  | EVSDGFTAV               | EVPDGFTAV         | p.P198S               | c.592C>T              | 28             | 32                 | RNPEP       | uc001gxd.1     | <30                                    |
| 12  | ESFFWLEEM               | ESFSWLEEM         | p.S123F               | c.368C>T              | 29             | 28                 | DONSON      | uc002ysi.1     | <30                                    |
| 13  | HLIAIFCAY               | HLIAILCAY         | p.L269F               | c.805C>T              | 34             | 25                 | OR10D3      | uc0000318666   | <30                                    |
| 14  | SVVNPIIFY               | SVVNPIIYSY        | p.S294F               | c.881C>T              | 34             | 29                 | LPAR3       | uc001dkl.2     | <30                                    |
| 15  | FTMVILYVVY              | FTMVISYVVY        | p.S219L               | c.656C>T              | 43             | 39                 | LRRC3B      | uc003cdp.1     | <30                                    |
| 16  | YLIGVIGNF               | YLIGVIGNS         | p.S45F                | c.134C>T              | 49             | 9253               | OR52A5      | uc001mab.1     | <30                                    |
| 17  | ETWRETGIF               | ETWRETGIS         | p.S1169F              | c.3506C>T             | 52             | 9327               | DOCK3       | uc003dbb.1     | NT <sup>d</sup>                        |
| 18  | ELSFHPSGNY              | GLSFHPSGNY        | p.G196E               | c.587G>A              | 52             | 5842               | DKFZp434C2  | uc003dev.1     | <30                                    |
| 19  | YTFLIFSDY               | YTFLISSDY         | p.S849F               | c.2546C>T             | 60             | 58                 | BCR         | uc002zww.1     | <30                                    |
| 20  | MVILYVVYY               | MVISYVVYY         | p.S219L               | c.656C>T              | 62             | 14                 | LRRC3B      | uc002zww.1     | <30                                    |
| 21  | ETWRETGIF               | ETWRETGIS         | p.S1169F              | c.3506C>T             | 75             | 72                 | DOCK3       | uc003dbb.1     | <30                                    |
| 22  | NTASSSLAF               | DTASSSLAF         | p.D48N                | c.142G>A              | 81             | 10                 | MAGEB4      | uc004dcb.1     | <30                                    |
| 23  | EATNPYMY                | GATNPYMY          | p.G103E               | c.308G>A              | 86             | 9589               | MAS1L       | uc003nmm.1     | <30                                    |
| 24  | SVMYQGNTY               | PVMYQGNTY         | p.P60S                | c.178C>T              | 87             | 4455               | UEVLD       | uc001mot.1     | <30                                    |
| 25  | ETAPSTNSV               | GTAPSTNSV         | p.G428E               | c.1283G>A             | 88             | 10172              | LLRN4       | uc002wmo.2     | <30                                    |
| 26  | EIKKDG VGF              | EIKEDG VGF        | p.E1176K              | c.3526G>A             | 90             | 52                 | KIF21B      | uc001gvr.1     | <30                                    |
| 27  | FAHFHSGEM               | FAHFHSGGM         | p.G286E               | c.857G>A              | 98             | 54                 | CXorf64     | uc010nra.1     | <30                                    |
| 28  | ELPIFQQPFY              | EPPIFQQPFY        | p.P369L               | c.1106C>T             | 101            | 2510               | CDH5        | uc002eom.2     | <30                                    |
| 29  | EIPLIGLIPF              | EIPLIGLIPS        | p.S138F               | c.413C>T              | 104            | 8911               | CXorf22     | uc004ddj.1     | <30                                    |
| 30  | FLFINTSSY               | SLFINTSSY         | p.S169F               | c.506C>T              | 118            | 642                | KIAA0922    | uc003inm.2     | <30                                    |
| 31  | DMIFFSIDRY              | DMISFSIDRY        | p.S211F               | c.632C>T              | 122            | 148                | IGSF10      | uc003eyz.1     | <30                                    |
| 32  | ESVINQGPM               | GSVINQGPM         | p.G653E               | c.1958G>A             | 133            | 11694              | RFX6        | uc003pxm.1     | <30                                    |
| 33  | ESVTSCEAY               | EPVTSCEAY         | p.P144S               | c.430C>T              | 162            | 1402               | AFP         | uc003hgz.1     | <30                                    |
| 34  | YVKLANLSY               | YVKLANLPY         | p.P123S               | c.367C>T              | 173            | 144                | TRYX3       | uc003vxb.1     | <30                                    |
| 35  | ELVGYGQKF               | EFVGYGQKF         | p.F360L               | c.1078T>C             | 173            | 1634               | MPP4        | uc010ftj.1     | NT                                     |
| 36  | FGYEHWALY               | LYGYEHWALY        | p.L19F                | c.55C>T               | 176            | 2666               | RARRES3     | uc001nxf.2     | <30                                    |
| 37  | YVVTISSLL               | HVVTISSLL         | p.H776Y               | c.2326C>T             | 181            | 141                | PTPRO       | uc001rev.1     | <30                                    |
| 38  | SVVNPIIYF               | SVVNPIIYS         | p.S294F               | c.881C>T              | 190            | 13358              | LPAR3       | uc001dkl.2     | NT                                     |
| 39  | TTATISGLV               | TTATVSGLV         | p.V901I               | c.2701G>A             | 209            | 370                | UBA6        | uc003hdg.2     | <30                                    |
| 40  | GTFEVLAYY               | GTFSVLAYY         | p.S269F               | c.806C>T              | 213            | 182                | HHLA2       | uc003dwy.2     | <30                                    |
| 41  | ELKHILYAF               | ELKHILYHAF        | p.H142Y               | c.424C>T              | 214            | 103                | CALN1       | uc003twa.2     | <30                                    |
| 42  | HMSSYIASF               | HMSSYIASL         | p.L356F               | c.1066C>T             | 225            | 2654               | LST-3TM12   | uc001ren.1     | <30                                    |
| 43  | ETCTAGASSL              | ETCTAGAGSL        | p.G307S               | c.919G>A              | 235            | 176                | EDEM1       | uc003bqh.1     | <30                                    |
| 44  | ELVGYGQKFF              | EFVGYGQKFF        | p.F360L               | c.1078T>C             | 247            | 1681               | MPP4        | uc010ftj.1     | <30                                    |
| 45  | EVLVEYSFF               | EVLVEYPPF         | p.P649S               | c.1945C>T             | 254            | 821                | ATXN1       | uc003nbt.1     | <30                                    |
| 46  | TTTATISGL               | TTTATVSGL         | p.V901I               | c.2701G>A             | 258            | 405                | UBA6        | uc003hdg.2     | <30                                    |
| 47  | MIFFSIDRY               | MISFSIDRY         | p.S211F               | c.632C>T              | 274            | 406                | IGSF10      | uc003eyz.1     | NT                                     |
| 48  | YMAELFSFI               | YMAELFPFI         | p.P334S               | c.1000C>T             | 339            | 762                | CLCN4       | uc004csy.2     | <30                                    |
| 49  | HMIVISIAIY              | HMIVVSIAY         | p.V246I               | c.736G>A              | 350            | 464                | OR6C2       | uc001sgz.1     | <30                                    |
| 50  | FTGTISVMY               | FTGTIPVMY         | p.P60S                | c.178G>A              | 359            | 1043               | UEVLD       | uc001mot.1     | <30                                    |

a. Mutated residues are underlined.

b. The wild type amino acid is followed by the mutated residue along with its position.

c. The wild type base is followed by the mutated base along with its position in the coding sequence.

d. NT -The indicated peptides were not tested, as they overlapped extensively with additional peptides that were evaluated in this assay for T cell recognition.

**Supplementary Table 4. Candidate HLA-A\*0101-binding epitopes identified from 3309 mel.**

| No. | <u>Mutated Peptide</u>          | <u>WT Peptide</u>            | <u>Protein change</u> | <u>cDNA change</u>    | Predicted HLA-A*0101 binding affinity (nM) |           | <u>Gene</u> | <u>Gene ID</u> | IFN- $\gamma$ (pg/ml) |
|-----|---------------------------------|------------------------------|-----------------------|-----------------------|--------------------------------------------|-----------|-------------|----------------|-----------------------|
|     |                                 |                              |                       |                       | <u>Mutated</u>                             | <u>WT</u> |             |                |                       |
| 1   | LTERAN <u>F</u> QY <sup>a</sup> | LTERAD <u>F</u> QY           | p.D75N <sup>b</sup>   | c.223G>A <sup>c</sup> | 10                                         | 11        | FAM108A1    | uc001hkn.1     | <30                   |
| 2   | F <u>S</u> SYEPWGY              | F <u>P</u> SYEPWGY           | p.P506S               | c.1516C>T             | 17                                         | 2390      | GYS2        | uc001rfb.1     | <30                   |
| 3   | FTN <u>F</u> WGLLI              | FTD <u>F</u> WGLLI           | p.D101N               | c.301G>A              | 70                                         | 10        | PLA2G4E     | uc001zov.1     | <30                   |
| 4   | <u>L</u> SAKTCNV <u>D</u> Y     | <u>P</u> SAKTCNV <u>D</u> Y  | p.P212L               | c.635C>T              | 73                                         | 823       | AEBP1       | uc003tkd.1     | <30                   |
| 5   | <u>S</u> SYEPWGY                | <u>P</u> SYEPWGY             | p.P506S               | c.1516C>T             | 79                                         | 328       | GYS2        | uc001rfb.1     | NT <sup>d</sup>       |
| 6   | STEDCL <u>I</u> LLF             | STEDCL <u>I</u> PLF          | p.P1376L              | c.4127C>T             | 102                                        | 421       | SMG1        | uc002dfm.1     | <30                   |
| 7   | S <u>S</u> EMAENEDY             | S <u>P</u> EMAENEDY          | p.P1645S              | c.4933C>T             | 114                                        | 10787     | JARID1A     | uc001qif.1     | <30                   |
| 8   | F <u>S</u> ARVLKSY              | F <u>P</u> ARVLKSY           | p.P191S               | c.571C>T              | 115                                        | 9052      | ATP1B1      | uc001gfr.1     | <30                   |
| 9   | GMD <u>G</u> AYLNGY             | GMD <u>V</u> AYLNGY          | p.V430G               | c.1289T>G             | 135                                        | 131       | KBTBD6      | uc001uxu.1     | <30                   |
| 10  | NSGGY <u>P</u> PLCY             | NSGGY <u>P</u> PCY           | p.S161L               | c.482C>T              | 148                                        | 652       | PBX3        | uc004bqd.1     | <30                   |
| 11  | KTMCEC <u>M</u> SFY             | KTMCEC <u>M</u> SSY          | p.S319F               | c.956C>T              | 153                                        | 523       | CUL3        | uc002vny.1     | <30                   |
| 12  | Q <u>S</u> ARLYIVAY             | Q <u>S</u> ARLYIVAY          | p.T23I                | c.68C>T               | 153                                        | 102       | XKR5        | uc003wqp.1     | <30                   |
| 13  | ASIR <u>N</u> ANLY              | ASIR <u>D</u> ANLY           | p.D134N               | c.400G>A              | 106                                        | 132       | ELAVL4      | uc001cry.2     | NT                    |
| 14  | NT <u>L</u> EQTVPY              | NT <u>P</u> EQTVPY           | p.P121L               | c.362C>T              | 205                                        | 401       | EDN3        | uc002yar.1     | <30                   |
| 15  | MSH <u>N</u> TEMNNY             | MSH <u>D</u> TEMNNY          | p.D251N               | c.751G>A              | 227                                        | 144       | CCDC33      | uc002axp.2     | <30                   |
| 16  | ESDQ <u>P</u> DLS <u>S</u> F    | ESDQ <u>P</u> DLS <u>N</u> F | p.N189S               | c.566A>G              | 319                                        | 424       | CHRNA1      | uc002uje.2     | <30                   |
| 17  | LVEQAL <u>R</u> FY              | LVEQAL <u>R</u> FH           | p.H1295Y              | c.3883C>T             | 357                                        | 13059     | NBAS        | uc002rec.1     | <30                   |
| 18  | SCD <u>S</u> LCGGY              | SCD <u>A</u> LCGGY           | p.A394S               | c.1180G>T             | 359                                        | 426       | KIAA1890    | uc003wqc.2     | <30                   |
| 19  | SASIR <u>N</u> ANLY             | SASIR <u>D</u> ANLY          | p.D134N               | c.400G>A              | 378                                        | 428       | ELAVL4      | uc001cry.2     | <30                   |
| 20  | G <u>S</u> YECHVGIY             | G <u>P</u> YECHVGIY          | p.P113S               | c.337C>T              | 429                                        | 11910     | IGSF21      | uc001bau.1     | <30                   |
| 21  | LMDD <u>S</u> LMQIF             | LMDD <u>S</u> LMQIS          | p.S222F               | c.665C>T              | 461                                        | 6556      | RTTN        | uc002lqp.1     | <30                   |
| 22  | <u>F</u> VASRTRPDY              | <u>S</u> VASRTRPDY           | p.S56F                | c.167C>T              | 559                                        | 1567      | TMC5        | uc002dgb.2     | <30                   |
| 23  | TMCEC <u>M</u> SFY              | TMCEC <u>M</u> SSY           | p.S319F               | c.956C>T              | 589                                        | 1769      | CUL3        | uc002vny.1     | NT                    |
| 24  | CATCA <u>E</u> NFY              | CATCA <u>E</u> NSY           | p.S82F                | c.245C>T              | 627                                        | 2569      | LTBR        | uc001qnz.1     | <30                   |
| 25  | A <u>L</u> EVLQSIY              | A <u>P</u> EVLQSIY           | p.P184L               | c.551C>T              | 648                                        | 6454      | TSSK2       | uc002zow.1     | <30                   |
| 26  | LGDIYNEK <u>R</u> Y             | LGDIYNEK <u>G</u> Y          | p.G394R               | c.1180G>A             | 671                                        | 795       | TTC29       | uc003ikx.2     | <30                   |
| 27  | VIN <u>L</u> LSCLPY             | VID <u>L</u> LSCLPY          | p.D238N               | c.712G>A              | 798                                        | 19        | KCNH5       | uc001xga.2     | <30                   |
| 28  | FVDEN <u>V</u> DRM              | FVDEN <u>L</u> DRM           | p.L423V               | c.1267T>G             | 889                                        | 561       | NOL4        | uc010dmi.1     | <30                   |
| 29  | VSD <u>M</u> SLSLS              | VSD <u>M</u> GLSLS           | p.G72S                | c.214G>A              | 828                                        | 643       | OR51A7      | uc001lzq.1     | NT                    |
| 30  | VSD <u>M</u> SLSLSS             | VSD <u>M</u> GLSLSS          | p.G72S                | c.214G>A              | 991                                        | 875       | OR51A7      | uc001lzq.1     | <30                   |
| 31  | STEDCL <u>I</u> LL              | STEDCL <u>I</u> PL           | p.P1376L              | c.4127C>T             | 888                                        | 421       | SMG1        | uc002dfm.1     | NT                    |
| 32  | F <u>S</u> QESPLDTF             | F <u>P</u> QESPLDTF          | p.P404S               | c.1210C>T             | 1030                                       | 15956     | NOBOX       | uc003wen.1     | <30                   |
| 33  | TMM <u>F</u> FAEHY              | TMM <u>F</u> LAEHY           | p.L1354F              | c.4060C>T             | 1052                                       | 1272      | KIAA1429    | uc003ygo.1     | <30                   |
| 34  | HLGVF <u>S</u> SY               | HLGVF <u>P</u> SY            | p.P506S               | c.1516C>T             | 1082                                       | 999       | GYS2        | uc001rfb.1     | <30                   |

a. Mutated residues are underlined.

b. The wild type amino acid is followed by the mutated residue along with its position.

c. The wild type base is followed by the mutated base along with its position in the coding sequence.

d. NT - The indicated peptides were not tested, as they overlapped extensively with additional peptides that were evaluated in this assay for T cell recognition.

**Supplementary Table 5. Candidate HLA-A\*1101-binding epitopes identified from 3309 mel.**

| No. | Mutated Peptide                     | WT Peptide                   | Protein change        | cDNA change             | Predicted HLA-A*1101 binding affinity (nM) |       | Gene    | Gene ID    | Expressed gene   | IFN- $\gamma$ (pg/ml) |
|-----|-------------------------------------|------------------------------|-----------------------|-------------------------|--------------------------------------------|-------|---------|------------|------------------|-----------------------|
|     |                                     |                              |                       |                         | Mutated                                    | WT    |         |            |                  |                       |
| 1   | STFFLAHGLK <sup>a</sup>             | STFSLAHGLK                   | p.S6654F <sup>b</sup> | c.19961C>T <sup>c</sup> | 4                                          | 4     | MUC16   | uc002mkp.1 | Mut <sup>d</sup> | 46                    |
| 2   | <b>KT</b> LT <b>S</b> VFQK          | ETLTSVFQK                    | p.E226K               | c.676G>A                | 5                                          | 20    | MATN2   | uc003yid.1 | Mut/WT           | 1263                  |
| 3   | MTFLGGN <u>L</u> VK                 | MTFLGGN <u>P</u> VK          | p.P1210L              | c.3629C>T               | 7                                          | 8     | SALL1   | uc002egt.2 | Mut/WT           | 47                    |
| 4   | <b>KT</b> LT <b>S</b> VFQ <b>KK</b> | ETLTSVFQ <b>KK</b>           | p.E226K               | c.676G>A                | 9                                          | 133   | MATN2   | uc003yid.1 | Mut/WT           | 894                   |
| 5   | HTIPQAYWTK                          | HTIPQAHWTK                   | p.H36Y                | c.106C>T                | 10                                         | 13    | NGF     | uc001efu.1 | NA               | 38                    |
| 6   | KSSSIYSIV <u>K</u>                  | KSSSIYSIV <u>N</u>           | p.N204K               | c.611C>A                | 15                                         | 11154 | ZAN     | uc003uwj.1 | NA               | 52                    |
| 7   | ITSSAELL <u>K</u>                   | ITSSAEL <u>F</u> K           | p.F414L               | c.1240T>C               | 16                                         | 11    | LPHN2   | uc009wcd.1 | NA               | 69                    |
| 8   | SSSIYSIV <u>K</u>                   | SSSIYSIV <u>N</u>            | p.N204K               | c.611C>A                | 16                                         | 14099 | ZAN     | uc003uwj.1 | NA               | 62                    |
| 9   | MSFYLR <b>E</b> Q <b>G</b> K        | MSSYLRE <b>Q</b> G <b>K</b>  | p.S319F               | c.956C>T                | 17                                         | 64    | CUL3    | uc002vny.1 | Mut/WT           | 42                    |
| 10  | STGLKMAME <u>K</u>                  | STGLKMAMER <u>R</u>          | p.R2094K              | c.6281G>A               | 17                                         | 132   | XIRP2   | uc002udy.2 | NA               | 53                    |
| 11  | KTMCECM <u>S</u> FY                 | KTMCECM <u>S</u> SY          | p.S319F               | c.956C>T                | 18                                         | 25    | CUL3    | uc002vny.1 | Mut/WT           | 53                    |
| 12  | VVLAVRL <u>S</u> CK                 | VVLAVRL <u>S</u> RK          | p.R337C               | c.1106C>T               | 22                                         | 19    | SELPLG  | uc001tnh.1 | Mut/WT           | 37                    |
| 13  | ASLDGASLEK                          | ASPDGASLEK                   | p.P811L               | c.2432C>T               | 24                                         | 244   | ATP10D  | uc003gkx.1 | Mut/WT           | 45                    |
| 14  | QALRFYDYK                           | QALRFH <b>D</b> YK           | p.H1295Y              | c.3883C>T               | 26                                         | 25    | NBAS    | uc002rcc.1 | Mut/WT           | 49                    |
| 15  | KTLKINEV <u>K</u>                   | KTLKINEV <u>E</u>            | p.E103K               | c.307G>A                | 28                                         | 18579 | AMPH    | uc003tgw.1 | Mut/WT           | 48                    |
| 16  | IT <b>S</b> FIERK                   | IT <b>G</b> FIERK            | p.G8733S              | c.26197G>A              | 28                                         | 75    | TTN     | uc010frd.1 | NA               | 49                    |
| 17  | AIANRIK <u>F</u> K                  | AIANRIK <u>S</u> K           | p.S18F                | c.53C>T                 | 28                                         | 166   | Kin17   | uc009xip.1 | Mut              | 40                    |
| 18  | QLFNCQAL <u>Q</u> K                 | QLFNCQAL <u>R</u> K          | p.R72Q                | c.215G>A                | 28                                         | 26    | LRRC7   | uc001dep.1 | NA               | 56                    |
| 19  | ITNQMSID <u>K</u>                   | ITNQMSID <u>E</u>            | p.E492K               | c.1474G>A               | 30                                         | 19752 | PDE1B   | uc001sge.1 | NA               | 39                    |
| 20  | HTAKD <b>S</b> FECK                 | HTAKD <b>P</b> FECK          | p.P323S               | c.967C>T                | 30                                         | 34    | ZNF266  | uc010dwq.1 | Mut/WT           | 44                    |
| 21  | KAIANRIK <u>F</u> K                 | KAIANRIK <u>S</u> K          | p.S18F                | c.53C>T                 | 31                                         | 108   | Kin17   | uc009xip.1 | Mut              | 46                    |
| 22  | RIHT <b>S</b> A <b>K</b> PYK        | RIHT <b>S</b> E <b>K</b> PYK | p.E355A               | c.1064A>C               | 32                                         | 54    | ZNF667  | uc002qne.1 | Mut/WT           | 53                    |
| 23  | TITSSAELL <u>K</u>                  | TITSSAEL <u>F</u> K          | p.F414L               | c.1240T>C               | 33                                         | 20    | LPHN2   | uc009wcd.1 | NA               | 55                    |
| 24  | <b>CILGK</b> L <b>F</b> TK          | CILGEL <b>L</b> FTK          | p.E928K               | c.2782G>A               | 33                                         | 42    | CDK12   | uc002hrw.2 | Mut/WT           | 6475                  |
| 25  | SLGDHNFLR <u>K</u>                  | SLGDHNFLR <u>R</u>           | p.R29K                | c.86G>A                 | 36                                         | 285   | GRM3    | uc010lef.1 | NA               | 58                    |
| 26  | KINEV <u>K</u> TRK                  | KINEV <u>E</u> TRK           | p.E103K               | c.307G>A                | 38                                         | 46    | AMPH    | uc003tgw.1 | Mut/WT           | 47                    |
| 27  | SL <b>S</b> PIEMKK                  | SP <b>S</b> PIEMKK           | p.P87L                | c.266C>T                | 38                                         | 5820  | BCL11A  | uc002sae.1 | Mut/WT           | 61                    |
| 28  | FSLRAC <u>Y</u> HMK                 | FSLRAR <u>Y</u> HMK          | p.R1388C              | c.4162C>T               | 38                                         | 35    | APOB    | uc002red.1 | NA               | 62                    |
| 29  | KMTVVILQK                           | KMTVVV <b>L</b> QK           | p.V840I               | c.2518G>A               | 40                                         | 36    | ZNF644  | uc001dny.1 | Mut/WT           | 37                    |
| 30  | SSIYSIV <u>K</u> IK                 | SSIYSIV <u>N</u> IK          | p.N2037K              | c.6111C>A               | 40                                         | 20    | ZAN     | uc003uwj.1 | NA               | 53                    |
| 31  | SIYSIV <u>K</u> IK                  | SIYSIV <u>N</u> IK           | p.N2037K              | c.6111C>A               | 41                                         | 18    | ZAN     | uc003uwj.1 | NA               | 48                    |
| 32  | DV <b>F</b> KVIAYLK                 | DV <b>S</b> KVIAYLK          | p.S308F               | c.923C>T                | 41                                         | 142   | SCG2    | uc002vnm.1 | Mut/WT           | 55                    |
| 33  | QTACCACRK                           | QTAR <b>C</b> ACRK           | p.R67C                | c.199C>T                | 42                                         | 43    | AM19A5  | uc003bim.2 | Mut/WT           | 73                    |
| 34  | LSYN <b>S</b> HYSR                  | LSYN <b>S</b> HYSR           | p.F586S               | c.1757T>C               | 44                                         | 13    | TLR8    | uc004cvd.1 | NA               | 73                    |
| 35  | <u>L</u> VKFPEMFQK                  | <u>P</u> VKFPEMFQK           | p.P1210L              | c.3629C>T               | 44                                         | 716   | SALL1   | uc002egt.2 | Mut/WT           | 56                    |
| 36  | <b>CILGK</b> L <b>F</b> TK <b>K</b> | CILGEL <b>L</b> FTK <b>K</b> | p.E928K               | c.2782G>A               | 45                                         | 50    | CDK12   | uc002hrw.2 | Mut/WT           | 3622                  |
| 37  | LVANFSQ <u>I</u> K                  | LVANFSQ <u>E</u>             | p.E226K               | c.676G>A                | 47                                         | 25904 | MATN2   | uc003yid.1 | Mut/WT           | 54                    |
| 38  | H <b>I</b> NTVMEVK                  | H <b>K</b> NTVMEVK           | p.K288I               | c.863A>T                | 50                                         | 13461 | WDR33   | uc002tpg.1 | WT               | 64                    |
| 39  | RTMM <b>F</b> EA <b>H</b>           | RTMM <b>F</b> LA <b>H</b>    | p.L1354F              | c.4060C>T               | 53                                         | 81    | JAA1429 | uc003ygo.1 | Mut/WT           | 43                    |
| 40  | <u>K</u> ANRNLARK                   | <u>N</u> ANRNLARK            | p.N222K               | c.664T>G                | 53                                         | 412   | RSPO1   | uc001cbm.1 | NA               | 52                    |
| 41  | RSNPY <b>F</b> VASR                 | RSNPY <b>S</b> VASR          | p.S56F                | c.167C>T                | 54                                         | 99    | TMC5    | uc002dgb.2 | NA               | 53                    |
| 42  | MVSSNENCRK                          | MVPSNENCRK                   | p.P122S               | c.364C>T                | 55                                         | 332   | JAA1793 | uc010llq.1 | Mut/WT           | 52                    |
| 43  | <u>S</u> L <b>F</b> GLSFVR          | <u>S</u> P <b>F</b> GLSFVR   | p.P141L               | c.422C>T                | 58                                         | 4805  | XRCC1   | uc002owt.2 | Mut/WT           | 56                    |
| 44  | RVR <b>D</b> FIQMK                  | RV <b>G</b> DFIQMK           | p.G173R               | c.517G>A                | 59                                         | 26    | ATP10B  | uc003lym.1 | Mut/WT           | 44                    |
| 45  | TFFLAHGLK                           | T <b>F</b> SLAHGLK           | p.S6654F              | c.19961C>T              | 62                                         | 231   | MUC16   | uc002mkp.1 | Mut              | 45                    |
| 46  | MLNPLIYS <u>R</u>                   | MLNPLIYS <u>L</u> R          | p.L292F               | c.874C>T                | 64                                         | 80    | OR2T27  | uc001iet.1 | NA               | 43                    |

a. Mutated residues are underlined, and peptides recognized by TIL 3309 are bolded.

b. The wild type amino acid is followed by the mutated residue along with its position.

c. The wild type base is followed by the mutated base along with its position in the coding sequence.

d. Oligonucleotide primers flanking the regions that encode the candidate epitopes detailed in Supplementary Table 8 were used to amplify the indicated transcripts as described in the Online Methods. Mut - mutated WT-wild type NA - Not amplified. NA- A product corresponding to the appropriate gene product was not amplified from tumor cell RNA.

**Supplementary Table 6. Mutated candidate epitopes encoded by expressed genes.  
2098 mel**

| No. | <u>Mutated Peptide</u>               | <u>WT Peptide</u>            | <u>Protein change</u> | Predicted<br>HLA-A*0201<br>binding affinity (nM) |           | <u>Gene</u> | <u>Gene ID</u> |
|-----|--------------------------------------|------------------------------|-----------------------|--------------------------------------------------|-----------|-------------|----------------|
|     |                                      |                              |                       | <u>Mutated</u>                                   | <u>WT</u> |             |                |
| 1   | <b><u>GLFGDIYLA</u></b> <sup>a</sup> | G <u>S</u> FGDIYLA           | p.S27L <sup>b</sup>   | 6                                                | 1312      | CSNK1A1     | uc003lqw.1     |
| 2   | <u>FQLNQSF</u> EI                    | <u>S</u> QLNQSF <u>E</u> I   | p.S1281F              | 6                                                | 53        | UNC13A      | uc002nhd.1     |
| 3   | <u>RMLDKNPEV</u>                     | R <u>M</u> LDKN <u>P</u> ES  | p.S433V               | 7                                                | 1722      | CAMKK2      | uc001txt.1     |
| 4   | <u>HLMDGDLGL</u>                     | <u>N</u> LMDGDL <u>G</u> L   | p.N558H               | 10                                               | 11        | C1S         | uc001qsj.1     |
| 5   | <b><u>GLFGDIYLAI</u></b>             | G <u>S</u> FGDIYL <u>A</u> I | p.S27L                | 12                                               | 2394      | CSNK1A1     | uc003lqw.1     |
| 6   | <b><u>SLADEAEVYL</u></b>             | SLADEAEV <u>H</u> L          | p.H225Y               | 12                                               | 39        | GAS7        | uc002gmi.1     |
| 7   | <u>MLFLRF</u> CYI                    | MLFLRF <u>R</u> YI           | p.R55C                | 12                                               | 116       | WDR47       | uc001dww.1     |
| 8   | <u>YLTSLACVEI</u>                    | <u>Y</u> PTSLAC <u>V</u> EI  | p.P1039L              | 17                                               | 21684     | BRCA2       | uc001uub.1     |
| 9   | <u>LLADQNF</u> KFI                   | LLADQNL <u>K</u> FI          | p.L190F               | 20                                               | 30        | RRP1B       | uc002zdk.1     |
| 10  | <u>AMI</u> AKISNEL                   | AM <u>I</u> TAKISNEL         | p.T160A               | 22                                               | 33        | HAUS3       | uc003ges.1     |
| 11  | <u>HLMDGDLGLI</u>                    | <u>N</u> LMDGDL <u>G</u> LI  | p.N558H               | 22                                               | 20        | C1S         | uc001qsj.1     |
| 12  | <u>ALGTL</u> LHTNV                   | ALGTL <u>L</u> HNT <u>N</u>  | p.L1577V              | 23                                               | 143       | NOTCH2      | uc001eik.1     |
| 13  | <u>SVVDV</u> FFQL                    | SVVDV <u>F</u> S <u>Q</u> L  | p.S1281F              | 28                                               | 323       | UNC13A      | uc002nhd.1     |
| 14  | <b><u>ILNAMI</u>AKI</b>              | ILNAMI <u>T</u> KI           | p.T160A               | 34                                               | 36        | HAUS3       | uc003ges.1     |

**2369 mel**

|    | <u>Mutated Peptide</u>                      | <u>WT Peptide</u>                  | <u>Protein change</u> | Predicted<br>HLA-A*0101<br>binding affinity (nM) |           | <u>Gene</u> | <u>Gene ID</u> |
|----|---------------------------------------------|------------------------------------|-----------------------|--------------------------------------------------|-----------|-------------|----------------|
|    |                                             |                                    |                       | <u>Mutated</u>                                   | <u>WT</u> |             |                |
| 1  | <b><u>LTDDRL</u>FTCY</b>                    | LTDDRLFT <u>C</u> H                | p.H1005Y              | 3                                                | 97        | PLEKHM2     | uc001axa.2     |
| 2  | <u>ESDKK</u> VGTY                           | <u>L</u> SDKK <u>V</u> GTY         | p.L688F               | 5                                                | 8         | PLCB1       | uc002wna.1     |
| 3  | <u>HSEYSS</u> FFY                           | HSEYSS <u>F</u> H                  | p.H603Y               | 6                                                | 867       | HEG1        | uc003ehs.2     |
| 4  | <u>CSNFL</u> LLAY                           | CSNF <u>S</u> LLAY                 | p.S84L                | 7                                                | 7         | BAI3        | uc003pev.2     |
| 5  | <u>FTGTI</u> SVMY                           | FTGTI <u>P</u> VMY                 | p.P60S                | 12                                               | 11        | UEVLD       | uc001mot.1     |
| 6  | <u>ATALLEY</u> LEY                          | ATALLEY <u>P</u> EY                | p.P466L               | 20                                               | 81        | TBRG4       | uc003tmv.1     |
| 7  | <b><u>YTD</u>FHCQYV</b>                     | YTD <u>F</u> PCQY <u>V</u>         | p.P176H               | 49                                               | 72        | PPP1R3B     | uc003wsn.2     |
| 8  | <u>WADWGH</u> RTY                           | WADWGH <u>R</u> AY                 | p.A3344T              | 51                                               | 47        | LRP2        | uc002ues.1     |
| 9  | <u>VSDG</u> F <del>T</del> A <del>V</del> M | <u>V</u> PDGFT <u>A</u> V <u>M</u> | p.P198S               | 85                                               | 5735      | RNPEP       | uc001gxd.1     |
| 10 | <b><u>YTD</u>FHCQYV<b>K</b></b>             | YTD <u>F</u> PCQY <u>V</u> K       | p.P176H               | 100                                              | 136       | PPP1R3B     | uc003wsn.2     |

**3309 mel**

|    | <u>Mutated Peptide</u>         | <u>WT Peptide</u>                    | <u>Protein change</u> | Predicted<br>HLA-A*1101<br>binding affinity (nM) |           | <u>Gene</u> | <u>Gene ID</u> |
|----|--------------------------------|--------------------------------------|-----------------------|--------------------------------------------------|-----------|-------------|----------------|
|    |                                |                                      |                       | <u>Mutated</u>                                   | <u>WT</u> |             |                |
| 1  | <u>STF</u> LAHGLK              | STF <u>S</u> LAHGLK                  | p.S6654F              | 4                                                | 4         | MUC16       | uc002mkp.1     |
| 2  | <b><u>KTLT</u>SVFQK</b>        | <u>E</u> TLT <u>S</u> VFQK           | p.E226K               | 5                                                | 20        | MATN2       | uc003yid.1     |
| 3  | <u>MTFLG</u> GNLVK             | MTFLG <u>G</u> NP <u>V</u> K         | p.P1210L              | 7                                                | 8         | SALL1       | uc002egt.2     |
| 4  | <b><u>KTLT</u>SVFQ<b>K</b></b> | <u>E</u> TLT <u>S</u> VFQ <u>K</u> K | p.E226K               | 9                                                | 133       | MATN2       | uc003yid.1     |
| 5  | <u>MSFY</u> LREQGK             | M <u>S</u> SYLREQGK                  | p.S319F               | 17                                               | 64        | CUL3        | uc002vny.1     |
| 6  | <u>KTMCE</u> CMSFY             | KTMCE <u>C</u> M <u>S</u> SY         | p.S319F               | 18                                               | 44        | CUL3        | uc002vny.1     |
| 7  | <u>VVLAV</u> RLSCK             | VVLAV <u>R</u> LS <u>R</u> K         | p.R337C               | 22                                               | 21        | SELPLG      | uc001tnh.1     |
| 8  | <u>ASLD</u> GASLEK             | AS <u>P</u> DGASLEK                  | p.P811L               | 24                                               | 374       | ATP10D      | uc003gsk.1     |
| 9  | <u>QALRF</u> YDYK              | QALRF <u>H</u> DYK                   | p.H1295Y              | 26                                               | 25        | NBAS        | uc002rcc.1     |
| 10 | <u>KTLK</u> INEVK              | KTLKINE <u>V</u> E                   | p.E103K               | 28                                               | 18579     | AMPH        | uc003tgw.1     |
| 11 | <u>AIANRI</u> KFK              | AIANRI <u>K</u> SK                   | p.S18F                | 28                                               | 166       | Kin17       | uc009xip.1     |
| 12 | <u>HTAKD</u> SFECK             | HTAKD <u>P</u> FECK                  | p.P323S               | 30                                               | 34        | ZNF266      | uc010dwq.1     |
| 13 | <u>KAIANRI</u> KFK             | KAIANRI <u>K</u> SK                  | p.S18F                | 31                                               | 108       | Kin17       | uc009xip.1     |
| 14 | <u>RIHTS</u> AKPYK             | RIHT <u>S</u> EKPYK                  | p.E355A               | 32                                               | 54        | ZNF667      | uc002qne.1     |
| 15 | <b><u>CILG</u>KLFTK</b>        | CIL <u>G</u> ELFTK                   | p.E928K               | 33                                               | 42        | CDK12       | uc002hrw.2     |
| 16 | <u>KINEV</u> KTRK              | KINE <u>V</u> ETRK                   | p.E103K               | 38                                               | 46        | AMPH        | uc003tgw.1     |
| 17 | <u>S</u> LSP <del>I</del> EMKK | <u>S</u> PSPIEMKK                    | p.P87L                | 38                                               | 5820      | BCL11A      | uc002sae.1     |
| 18 | <u>KMTV</u> VILQK              | KMTV <u>V</u> VLQK                   | p.V840I               | 40                                               | 36        | ZNF644      | uc001dny.1     |
| 19 | <u>DVFK</u> VIAYLK             | DV <u>S</u> KVIAYLK                  | p.S308F               | 41                                               | 142       | SCG2        | uc002vnm.1     |
| 20 | <u>QTAC</u> CACRK              | QTAR <u>C</u> ACRK                   | p.R 67C               | 42                                               | 43        | FAM19A5     | uc003bim.2     |
| 21 | <u>L</u> VKFP <u>E</u> MFQK    | <u>P</u> VKFP <u>E</u> MFQK          | p.P1210L              | 44                                               | 716       | SALL1       | uc002egt.2     |
| 22 | <b><u>CILG</u>KLFT<b>K</b></b> | CIL <u>G</u> ELFT <b>K</b> K         | p.E928K               | 45                                               | 50        | CDK12       | uc002hrw.2     |

a. Mutated residues are underlined, and peptides recognized by TIL are bolded.

b. The wild type amino acid is followed by the mutated residue along with its position.

## Supplementary Methods Primer list.

Primers used to amplify genes encoding candidate HLA-A\*0201-binding epitopes from 2098 mel.

| Gene      | Gene ID    | Forward Primer                        | Reverse Primer              |
|-----------|------------|---------------------------------------|-----------------------------|
| ZNF559    | uc002mle.2 | GATGCTGGAGAACTATAAGAATCTAGT           | ACTGGATGTTTTCCCTGC          |
| CSNK1A1   | uc003lqw.1 | CACCATGGCGAGTAGCAGCGGCTC              | GAAATTGAAGAGGTCTTCGAGGCTAGG |
| TRPC6     | uc001pgk.2 | GACTATCTGCTCATGGACTCG                 | CTTCTAACATCTTCGCACCA        |
| SERPINB11 | uc002ljk.2 | AGTCTAACTTGCCACTCTGTGAAC              | CAAGGAGGACCATGCTTAGAG       |
| HTR1F     | uc003dqr.2 | AACTCCCTTGATGATCGCTG                  | ATCTGTGATTGCTCGATACCG       |
| UNC13A    | uc002nhd.1 | ATGAGTATGTGACGGAACCTCC                | AGGCAAAGTCCTTGAGATG         |
| PXDNL     | uc003xqu.2 | GTGTGGCTCGGAATCTTTTG                  | CACGCGGTAATGAAATTGAG        |
| KCNK5     | uc003oon.1 | CATCACAGGAACCAGACC                    | CTCTTGGTAAGGAACTGCCC        |
| CNKSRI    | uc001blm.2 | GCTGAAGAAGATCCCATAACC                 | GAAGACAGGTCAAAGGCAAAG       |
| MAR11     | uc003jfo.2 | CTGTGCCTGCTAAAATGGATC                 | CAAATTCACAGCTCGCCAG         |
| C1S       | uc001qsj.1 | TGGGTGAATGAGGTGCTG                    | TTAGGAGTGAAAACATAGGCCTC     |
| GPR174    | uc004edg.1 | AACTCCGCTTCTGATTGTCC                  | CAAGACACAATGCCACAGAATG      |
| WDR47     | uc001dwk.1 | AGTGGAGTCATAAATGGCCTG                 | TCATCTTCTGCTGACATCGC        |
| GAS7      | uc010coh.1 | CTCTCAGAACTCCTTGCTTC                  | GAAGGTCCGCAATGTGGT          |
| GSTA4     | uc003pbc.1 | TGCACACCATTTCCTACAG                   | TGCCAGGTTCAAGGAATCTC        |
| OR8D4     | uc001pzj.1 | AACCATTCCACAGTGACTGAG                 | GGGTAATGACAGAAGAATAGCAGA    |
| IGF1      | uc001tjn.2 | GTA AACGACGGCCAGAGCAGTCTTCCAACCCAATTA | CTTAGATCACAGCTCCGGAAG       |
| OR8D4     | uc001pzj.1 | AACCATTCCACAGTGACTGAG                 | GGGTAATGACAGAAGAATAGCAGA    |
| BRCA2     | uc001uub.1 | TTTGGAGGTAGCTTCAGAACAG                | AGTTCTGTAATTTCTGCCTTTTGG    |
| RRP1B     | uc002zdk.1 | GATGAACTCTCAAAGTCGGG                  | CACCCACTTTTGTCTTCTGTTC      |
| CNTN5     | uc001pga.1 | TTTTATAGGCAAGAGGGTCACAG               | GCAGTTTTACCAGGAAGTTG        |
| HAUS3     | uc003ges.1 | AAGCTGAAGCAGAGTCAAGG                  | GCATCCAAATTTCTTTGTCCAC      |
| C1S       | uc001qsj.1 | TGGGTGAATGAGGTGCTG                    | TTAGGAGTGAAAACATAGGCCTC     |
| NOTCH2    | uc001eik.1 | GGAGTGTGGTTGGGATGG                    | TCCGTGTTCTTGAAGCAGTG        |
| KCNA6     | uc001qnf.1 | GAGGGAGAGCAACAGGATG                   | AGAAGTACTCGTTCCTCAGGG       |
| UNC13A    | uc002nhd.1 | ATGAGTATGTGACGGAACCTCC                | AGGCAAAGTCCTTGAGATG         |
| MYH4      | uc002gmn.1 | GAGGTAAGTAAAAGAGCTGAGG                | TCACCCTCCAGTTTTCTCTTG       |
| A2BP1     | uc002cyr.1 | GAGTTCTCCTGCATCCTTATGG                | GCTGAGACTTGTTCCTCCGTG       |
| OR8D4     | uc001pzj.1 | AACCATTCCACAGTGACTGAG                 | GGGTAATGACAGAAGAATAGCAGA    |
| GALNT14   | uc002rns.1 | TCAGGAAAAGAAGATAAGAGGTAGC             | CTGCAAATGGAAGTGAAGTTC       |
| CNTN5     | uc001pga.1 | CAGCAACAGCCAAGTTATTG                  | CAGGAAGTTGAAGGAATCATC       |
| OR6C68    | uc001shb.1 | TTTCTTAGAAATCTCATTTACAG               | CATCTGCTCAATTAATGATGTG      |
| C1orf175  | uc001cxp.1 | TCGGAGGTCATGCTCAGC                    | AGCTGTTGACGGACAGGAG         |
| IMPG2     | uc003duq.1 | TACCTGAGTGTGGAAGAACG                  | CTTCTCACATCCAGCCCTG         |
| CRISPLD1  | uc003yan.1 | GTGTACCGCGGGAGTG                      | AGATCTTTCCAGCTCTACATC       |
| CRISPLD1  | uc003yan.1 | CATTATTTTCATCAAGTCCAATAG              | CCTTTCTCCTGGAGGATTC         |
| IL1RL2    | uc002tbs.1 | ACCAAGGATAATACAAATCTAC                | TCATACAGCTTCCCATCTAC        |
| A2ML1     | uc001quz.2 | GATCCTTGACTCTCACTATTC                 | TTCACAGGGATCAGAATACTG       |
| MPHOSPH9  | uc001uel.1 | CACAAAACTGAAGCAGAACC                  | GATTCCTCTCAGGTAAGTGC        |
| NETO1     | uc002lkw.2 | ATCATCCTCCATTTGTCTGG                  | ATAGATTCAGCTCTCCATC         |
| C20orf70  | uc002wyo.1 | GTGGATAAGCTGGAACCTG                   | TCTGGGGATCAGTTCAATTG        |
| FGFR4     | uc003mfl.1 | AGGGCAGGCGCTCCACG                     | CCATCTCCGAGACCAGGTC         |
| SPACA3    | uc002hhs.1 | GTGGTGGCTCCACCTCTG                    | TTGAGATTAGGATTCACAAAATC     |
| RAB40B    | uc002kft.1 | CGTTCAAGCGCAGGTGC                     | CGAGCTTCACTTTGCGGAG         |
| GPLD1     | uc003ned.1 | GTGATTTTGGAGGAGATGTG                  | TTTTGCTGGCCGCCACATG         |
| AASS      | uc003vka.1 | TCGGAGGTCATGCTCAGC                    | AGCTGTTGACGGACAGGAG         |
| AK310432  | uc009vll.1 | GATCCTTGACTCTCACTATTC                 | TTCACAGGGATCAGAATACTG       |
| C15orf32  | uc002brc.1 | AACACCAAGACTTCCCCAAG                  | GCTGACTCTCATAAGATGCCTC      |
| CAMKK2    | uc001txt.1 | GGAAGGCCCTGGATGTTTG                   | GTTCCCAAAGGAGCGTTTAC        |
| SCN3A     | uc002ucx.1 | TTCAATGGAGATGCTGGAGG                  | GATCGCAGTACAGACAATCCC       |

**Primers used to amplify genes encoding candidate HLA-A\*0101-binding epitopes from 2369 mel.**

| <b>Gene</b> | <b>Gene ID</b> | <b>Forward Primer</b>                    | <b>Reverse Primer</b>     |
|-------------|----------------|------------------------------------------|---------------------------|
| C22orf33    | uc003aqe.1     | GTAAAACGACGGCCAGCAGAAAAGGGCAAGCTCATG     | ACTGATTTCTCAATGACCTCTGG   |
| PLEKHM2     | uc001axa.2     | GTAAAACGACGGCCAGCATCTCTGCCAGGCTGTGTC     | GAGAACTCCAAGACGCAGTACTC   |
| GRIN3B      | uc002lqo.1     | GTAAAACGACGGCCAGCTCTTCTCACCCTGTACG       | CCCAGAGGTTTCATGAGCAG      |
| PLCB1       | uc002wna.1     | GTAAAACGACGGCCAGACAATGGACCTGGCTATGC      | CTACTTCCACGTAAGTCCCAAC    |
| HEG1        | uc003ehs.2     | GTAAAACGACGGCCAGACATCTTCTCGGAAAGCTTG     | GGACGGAAGGTTGGATGTATG     |
| BAI3        | uc003pev.2     | GTAAAACGACGGCCAGCTTTACAACTGCCTTGGACG     | TTCATGGGAAAAATGATCAAAGTGA |
| MPP4        | uc002uyj.2     | GTAAAACGACGGCCAGCTTGTCCCTTCTAACCAC       | TGAGACTTCCCTGCGACAAAAG    |
| OR4C46      | uc001nhj.1     | GTAAAACGACGGCCAGTGCAACCATAACAGATCCTCTTC  | CTTAGGGAGCACAAAGATGACC    |
| UEVLD       | uc001mot.1     | GTAAAACGACGGCCAGCTAACTGTGGAAGAATAAGGAATC | CCATATTTGCAGTTGGCTTC      |
| COL9A1      | uc003pfg.2     | GTAAAACGACGGCCAGTCCAGCAATACAGCTTTCATCG   | GGAGTATCCAATGCTATGCCTAG   |
| LST-3TM12   | uc001ren.1     | GTAAAACGACGGCCAGTAGCTAATTTGACCAACCGAAG   | TCCTGAAAACATGCCAATTG      |
| OR4C46      | uc001nhj.1     | GTAAAACGACGGCCAGTGCAACCATAACAGATCCTCTTC  | CTTAGGGAGCACAAAGATGACC    |
| OR2T2       | uc001iek.1     | GTAAAACGACGGCCAGCATCTGTATCACTGTCCCAAG    | ACCATGAATAAGCAAACCTTG     |
| MEOX2       | uc003stc.1     | GTAAAACGACGGCCAGTCTGTGCTCCAACCTTCC       | CTTTCCTGGGTTTGCTGTTG      |
| OR8B3       | uc001qac.1     | GTAAAACGACGGCCAGTCCATGTTGGGTGCATGAC      | AGAAGGTGAGTCTAAGCATGCAC   |
| PPP1R3B     | uc003wsn.2     | GTAAAACGACGGCCAGTTTCCAGAACCTCGCATTTGAG   | AGTACGTCTGTCCATTGCACTC    |
| LRP2        | uc002ues.1     | GTAAAACGACGGCCAGTCTTTGTCTCTGACCTCAATGG   | ACAGACTTGTGGTTCCATCC      |
| LRRC3B      | uc003cdp.1     | GTAAAACGACGGCCAGTGATCTGTAAAACGTCCCGTG    | CAAGTATTCGAGGTGTCTCCG     |
| C15orf2     | uc001ywo.1     | GTAAAACGACGGCCAGTCTTAGCTCCACACCCTCC      | AGGCTTGCTGGTGATAACTG      |
| RNPEP       | uc001gxd.1     | GTAAAACGACGGCCAGAGAAGCCCTTCGTGTACACC     | ACTTCAGCCGAAACAGATC       |
| MIRO-2      | uc002ciq.1     | GTAAAACGACGGCCAGATAGCTAATTTGACCAACCGAAG  | TCCTGAAAACATGCCAATTG      |
| PPP1R3B     | uc003wsn.2     | GTAAAACGACGGCCAGTTTCCAGAACCTCGCATTTGAG   | AGTACGTCTGTCCATTGCACTC    |
| BCR         | uc002zww.1     | GTAAAACGACGGCCAGTGTGCGAGCAGGAGTCAC       | CACACGAGTTGGTCAGCATC      |
| ABCA12      | uc002vev.1     | GTAAAACGACGGCCAGCCTTATCTCCAAGCAGTCTGG    | ATCGTATTGTGGACTGCAGG      |
| KIAA1211    | uc003hbk.2     | GTAAAACGACGGCCAGACCCAGCGAAGAGACAGC       | CTATCCCCTTTGCAGTCTCG      |
| SYPL2       | uc001dxo.2     | GACAGGAGCAATGGTTCCG                      | ATGGCTGCTGTCAAGCTGG       |
| PPP4R4      | uc001yes.1     | GTGCTCCCTGAATTAATAGAAC                   | CATGGCCGAAAGTTATAAGC      |
| FLRT2       | uc001xvr.1     | GACCACTCAGCTCCAC                         | GAACAAATGGTGTCTTCTACC     |
| HHLA2       | uc003dwy.2     | GGATCAAATTCATCTTATGAATG                  | CTACATGCACTGTGTGGATG      |
| CDH5        | uc002eom.2     | GACGCTTTCACCAATTGAGAC                    | CTGTCCAGTTCTTCTCATTG      |
| PCLO        | uc003uhv.2     | CAAGTCTTCACCAAGATTTTCC                   | AATTGTTATGGAAATGCTGCTG    |
| EDEM1       | uc003bqh.1     | ATAACTGACTCCAAGCAGCC                     | ATAGAAGGAGTCCAGCCCCG      |
| NCAPH       | uc002svz.1     | CAGGCACCAGGTTACTTAAG                     | GAGCGCTGTCAGCAGACTC       |
| CNOT1       | uc002enu.2     | CAGATCTTCTGCGTTCTTAC                     | GACCTCCCGAACACCAAAC       |
| RIMS2       | uc003yly.2     | GACGAAGGGGCCGACAG                        | GTTTTACAACAAGGCCACGG      |
| OC90        | uc003ytg.1     | AGATCATATGTGAGTCCAAGG                    | CAGCAGGGACAAGGGTTAC       |
| ATP8B1      | uc002lgw.1     | CATAAAATGGATAAGGAAATCAAC                 | CCACGTAACAAAATTTTATCAGC   |
| SAFB        | uc002mce.2     | GATGAAGCAGAAATGATAATGG                   | GATGGGCGCTGTCAAATAGG      |
| MYH2        | uc002gmp.2     | GATCAAATCATCAGTGCCAAC                    | GTAAATGGAGACCTTTTCTTC     |
| CHRN4       | uc002bed.1     | TCCCTTCGACCAGCAGAAC                      | ATCGAGGGAGGTGGGTGG        |
| CDC2L6      | uc003puh.1     | CCTGAACCAGGTGCTCC                        | GTGGGCTTGGTGGATAGG        |
| LPAR3       | uc001dkl.2     | CAGCCGCCGGAGGACAC                        | AGTGCTTTTATGCACTGCTGC     |
| RARRES3     | uc001nxf.2     | CTTCGCCACACCAAGAGCC                      | TTGGTACTCATGGTCCAAGC      |



**Primers used to amplify genes encoding candidate HLA-A\*1101-binding peptides from 3309 mel.**

| <b>Gene</b> | <b>Gene ID</b> | <b>Forward primer</b>   | <b>Reverse primer</b>     |
|-------------|----------------|-------------------------|---------------------------|
| RSPO1       | uc001cbl.1     | TGGGGGCCCTGCTCCAAGAA    | CATCTGCAGGGCCTGCCTAG      |
| LRRC7       | uc001dep.1     | AAAATCATCGGCCGTCTGGT    | ATGGCTTCACACAGCTCCTA      |
| ZNF664      | uc001dny.1     | CTGTTTTTCATCATCAAGTAA   | AGGAGCCTGGAGAAAATGCT      |
| NGF         | uc001efu.1     | ATGTCCATGTTGTTCTACACT   | AAGCTGCAGACACTCAGGAT      |
| OR2T27      | uc001iet.1     | TATAGGATGAGCGAGGCAGA    | CTCAGGAAAGGTAACCACTTTCTAA |
| PDE1B       | uc001sge.1     | CCCCTGGCGGATGAGGACTC    | CCAGAATGGGAATCTGGATTAG    |
| SELPLG      | uc001tnh.1     | TCTGTTTCATACCCTTTTCTGTG | CTAAGGGAGGAAGCTGTGC       |
| TMC5        | uc002dgc.2     | ATGTCTGCCTACTACAGGAAT   | ATCCCTACCACCGAGCATCA      |
| SALL1       | uc002egt.2     | TCCTCATCGAGTGCCCTGCA    | GGAACAGCTCACCTGTTAGT      |
| CDK12       | uc002hrw.2     | TGTTCTAACATTTTGCTGAA    | TCATTCCTTCTGCAGCACTT      |
| MUC16       | uc002mkp.1     | CCTTCCACAAACATAGCAGT    | CCACTGAAGTGATCCCCAGC      |
| XRCC1       | uc002owt.2     | TCAGCTGGAGGCGCTGGGGA    | TCACAGCCAGCGACCCAGCA      |
| ZNF667      | uc002qne.1     | GGCTTCAAAAAGAAATCAGT    | TTGAGTGTAAGGAATGTGGG      |
| NBAS        | uc002rcc.1     | AAGATCCTGCCTTTGCAAGT    | CAGCTAGCAGCTCTCTGCAG      |
| APOB        | uc002red.1     | CACTTCAAGTCTGTGGGATT    | TCTCAAAAGGTTTACTAATA      |
| BCL11A      | uc002sae.1     | CCTCTTGAAGCCATTCTTAC    | TAATCCCCACGCCTGGGATG      |
| WDR33       | uc002tpg.1     | AGCCCAGTGAGGGCCATGAC    | AAAACACAGTAATGGAAGTG      |
| XIRP2       | uc002udy.2     | AATATAAACCTTCAACCAAT    | TGTCCACAGAGAAGATAAAG      |
| SCG2        | uc002vnm.1     | GAAGATGTGGTCTGGGGGAGA   | TGCTCAAACTGGGGAGAAG       |
| CUL3        | uc002vny.1     | GACAAATCAACGGAAGAACC    | ACCTCAACTCCAGGTCTCCT      |
| FAM19A5     | uc003bim.2     | GACAAATCAACGGAAGAACC    | ACCTCAACTCCAGGTCTCCT      |
| ATP10D      | uc003gxk.1     | CGGTCTCGGACACCAGAGCA    | GGGAAGAATTACTACTTGAA      |
| ATP10B      | uc003lym.1     | ATGCCCTCCATGGAAGTCTT    | TTTTCCACAATACCATCGTG      |
| AMPH        | uc003tgw.1     | AAACAGAAGATGGAAGATTC    | TAGAAGGCTTTGGAGCCAAA      |
| ZAN         | uc003uwj.1     | TCGGGTGAAGAGGGCCGCCG    | CCAAGAATGCAAGACCTGGG      |
| ZAN         | uc003uwj.1     | ATCAGTGCCAAGCATGAGAA    | GGAAAGATAAGGACATTGAC      |
| KIAA1429    | uc003ygo.1     | CAGTCTCTCTGTGATCAGGA    | GAGATGATAATGGTCTCATG      |
| MATN2       | uc003yid.1     | AATGTGCCACGGGTCATAAT    | AGGACCACAACCTGTGAGCAG     |
| TLR8        | uc004cvd.1     | GAAAATCTTCTGACATTGC     | ACAACAGGTATATCTCCATT      |
| LPHN2       | uc009wcd.1     | TTAAACCGAGGAGAATATGT    | CCAAGGGGATAAAGTGGCCT      |
| Kin17       | uc009xip.1     | ATGGGGAAGTCGGATTT       | AACTTCTCAGGAGACGCTTT      |
| ZNF266      | uc010dwq.1     | CAGCACAGAAAACTCACAC     | AGGAATGTGGAAGGCCTTT       |
| TTN         | uc010frd.1     | AAGGATGCACTGCGAAAAGA    | ATCCACTAGGTCTCCAACA       |
| GRM3        | uc010lef.1     | ATGTTGACAAGACTGCAAGTT   | TGGGTGTTTACATTTTGGAT      |
| KIAA1793    | uc010llq.1     | GCCCTGCAGGTGATGTATGA    | CCTATAAGAAGAGTTACGGC      |
